# Supplementary material for: Expressions Profiles of the Proteins Associated with Carbohydrate Metabolism in Rat Liver Regeneration
Source: Hindawi journal article supplement (doi:10.1155/2017/8428926), 2017-01-01
Supplement: f1 [file 8428926.f1.pdf]

Supplementary table 1 the expression of proteins sugar related to metabolism in rat liver regeneration detected by iTRAQ

| Recovery time points (h) after PH |      |       |       |        |       |        |        | Recovery time points (h) after PH |      |        |        |        |        |        |        |
|-----------------------------------|------|-------|-------|--------|-------|--------|--------|-----------------------------------|------|--------|--------|--------|--------|--------|--------|
| Protein name                      | 0h   | 2h    | 6h    | 12h    | 24h   | 30h    | 36h    | Protein name                      | 0h   | 2h     | 6h     | 12h    | 24h    | 30h    | 36h    |
| <b>A. Signaling pathways</b>      |      |       |       |        |       |        |        | <b>B. carbohydrate metabolism</b> |      |        |        |        |        |        |        |
| <b>a. PKA Signaling</b>           |      |       |       |        |       |        |        | <b>d. HIF1α signaling</b>         |      |        |        |        |        |        |        |
| GNB1                              | 1.00 | 53.58 | 54.12 | 77.81  | 94.94 | 919.51 | 991.02 | PSMA3                             | 1.00 | 11.30  | 11.10  | 11.55  | 11.68  | 0.25   | 0.01   |
| CLIC4                             | 1.00 | 22.82 | 25.10 | 25.59  | 24.72 | 24.07  | 24.74  | GMFG                              | 1.00 | 0.11   | 3.46   | 3.33   | 3.46   | 1.64   | 3.56   |
| ITPR2                             | 1.00 | 5.52  | 4.82  | 4.99   | 4.38  | 5.04   | 4.53   | AKT1                              | 1.00 | 1.02   | 3.95   | 0.30   | 3.92   | 1.03   | 2.13   |
| PTPN12                            | 1.00 | 2.08  | 2.02  | 2.35   | 2.12  | 2.19   | 2.17   | PIK3R4                            | 1.00 | 20.29  | 32.04  | 2.10   | 27.49  | 22.85  | 34.79  |
| AKAP13                            | 1.00 | 40.39 | 5.26  | 10.37  | 5.57  | 4.26   | 1.05   | PIK3R1                            | 1.00 | 1.77   | 1.08   | 0.61   | 0.58   | 2.15   | 1.69   |
| PTPN1                             | 1.00 | 12.11 | 12.06 | 12.21  | 12.44 | 1.01   | 1.13   | LDHB                              | 1.00 | 0.00   | 0.10   | 0.04   | 0.10   | 0.71   | 0.72   |
| PPP1CB                            | 1.00 | 0.76  | 10.94 | 6.33   | 7.24  | 4.52   | 3.22   | EGLN2                             | 1.00 | 0.17   | 1.13   | 1.37   | 1.35   | 1.03   | 1.52   |
| PTPRK                             | 1.00 | 1.20  | 7.67  | 0.88   | 12.17 | 12.87  | 14.88  | PIK3CB                            | 1.00 | 1.03   | 0.03   | 0.88   | 1.07   | 1.05   | 1.08   |
| TNNI3                             | 1.00 | 2.90  | 2.20  | 0.77   | 2.09  | 1.77   | 0.83   | AKT1                              | 1.00 | 1.02   | 3.95   | 0.30   | 3.92   | 1.03   | 2.13   |
| AKAP14                            | 1.00 | 4.78  | 1.59  | 1.14   | 4.40  | 1.75   | 1.17   | ARNT                              | 1.00 | 1.08   | 0.93   | 1.80   | 0.18   | 2.18   | 0.82   |
| PHKG2                             | 1.00 | 3.29  | 1.23  | 0.83   | 1.09  | 1.67   | 1.63   | <b>e. HER-2 signaling</b>         |      |        |        |        |        |        |        |
| CLIC6                             | 1.00 | 0.38  | 0.31  | 0.05   | 0.07  | 0.10   | 0.46   | GSK3A                             | 1.00 | 0.07   | 0.07   | 0.95   | 1.06   | 0.28   | 0.04   |
| MYL3                              | 1.00 | 0.07  | 0.46  | 0.05   | 0.38  | 0.69   | 0.64   | PRKCI                             | 1.00 | 0.54   | 0.39   | 0.56   | 0.10   | 0.03   | 0.39   |
| GSK3A                             | 1.00 | 0.07  | 0.07  | 0.95   | 1.06  | 0.28   | 0.04   | AKT1                              | 1.00 | 1.02   | 3.95   | 0.30   | 3.92   | 1.03   | 2.13   |
| PPP1R10                           | 1.00 | 0.29  | 0.94  | 0.06   | 1.08  | 0.07   | 1.04   | <b>f. AMPK Signaling</b>          |      |        |        |        |        |        |        |
| CACNA1A                           | 1.00 | 1.62  | 0.86  | 0.53   | 0.49  | 1.01   | 0.08   | GNB1                              | 1.00 | 53.58  | 54.12  | 77.81  | 94.94  | 919.51 | 991.02 |
| PTPN9                             | 1.00 | 0.37  | 1.00  | 0.77   | 0.75  | 0.96   | 0.73   | PIK3R4                            | 1.00 | 20.29  | 32.04  | 2.10   | 27.49  | 22.85  | 34.79  |
| MYL2                              | 1.00 | 1.15  | 0.11  | 0.90   | 0.60  | 0.71   | 0.79   | CRAT                              | 1.00 | 8.98   | 7.91   | 7.78   | 7.59   | 3.09   | 0.81   |
| PHKB                              | 1.00 | 1.08  | 1.01  | 0.33   | 1.03  | 0.76   | 0.52   | INSR                              | 1.00 | 15.47  | 1.23   | 15.33  | 13.88  | 15.46  | 15.79  |
| ANAPC5                            | 1.00 | 1.36  | 0.69  | 0.10   | 1.05  | 0.57   | 0.91   | PDPK1                             | 1.00 | 1.23   | 2.02   | 2.14   | 0.87   | 2.10   | 0.81   |
| PPP1R14A                          | 1.00 | 0.94  | 1.09  | 1.11   | 0.04  | 0.97   | 1.09   | PIK3R1                            | 1.00 | 1.77   | 1.08   | 0.61   | 0.58   | 2.15   | 1.69   |
| PTPN6                             | 1.00 | 0.76  | 1.19  | 1.24   | 0.03  | 1.15   | 1.14   | CHRNA4                            | 1.00 | 1.13   | 1.06   | 1.13   | 1.13   | 0.05   | 0.05   |
| RYR3                              | 1.00 | 93.07 | 6.78  | 3.54   | 5.76  | 82.23  | 0.22   | PIK3CB                            | 1.00 | 1.03   | 0.03   | 0.88   | 1.07   | 1.05   | 1.08   |
| PRKACA                            | 1.00 | 7.58  | 0.41  | 7.59   | 3.04  | 2.92   | 2.33   | PRKACA                            | 1.00 | 7.58   | 0.41   | 7.59   | 3.04   | 2.92   | 2.33   |
| PPP1R7                            | 1.00 | 12.29 | 12.12 | 11.88  | 11.40 | 0.32   | 1.12   | TFRC                              | 1.00 | 6.42   | 0.50   | 6.55   | 6.55   | 3.73   | 1.76   |
| SIRPA                             | 1.00 | 13.15 | 0.12  | 8.01   | 13.59 | 0.39   | 11.35  | GNA13                             | 1.00 | 4.95   | 0.28   | 0.32   | 7.11   | 0.48   | 7.17   |
| GNA13                             | 1.00 | 4.95  | 0.28  | 0.32   | 7.11  | 0.48   | 7.17   | AKT1                              | 1.00 | 1.02   | 3.95   | 0.30   | 3.92   | 1.03   | 2.13   |
| <b>b. PPAR Signaling</b>          |      |       |       |        |       |        |        | <b>c. p53 Signaling</b>           |      |        |        |        |        |        |        |
| BMP15                             | 1.00 | 36.70 | 46.90 | 57.66  | 32.92 | 11.49  | 12.42  | PSMD2                             | 1.00 | 536.75 | 553.64 | 555.59 | 15.97  | 35.90  | 487.43 |
| GFER                              | 1.00 | 24.37 | 5.10  | 556.00 | 37.29 | 560.26 | 553.54 | PSMA1                             | 1.00 | 213.96 | 202.78 | 204.83 | 212.72 | 214.45 | 214.03 |
| PIK3R4                            | 1.00 | 20.29 | 32.04 | 2.10   | 27.49 | 22.85  | 34.79  | BMP15                             | 1.00 | 36.70  | 46.90  | 57.66  | 32.92  | 11.49  | 12.42  |
| IL1RAP                            | 1.00 | 2.97  | 18.62 | 20.26  | 20.72 | 4.56   | 79.78  | GFER                              | 1.00 | 24.37  | 5.10   | 556.00 | 37.29  | 560.26 | 553.54 |
| INSR                              | 1.00 | 15.47 | 1.23  | 15.33  | 13.88 | 15.46  | 15.79  | PIK3R4                            | 1.00 | 20.29  | 32.04  | 2.10   | 27.49  | 22.85  | 34.79  |
| PIK3R1                            | 1.00 | 1.77  | 1.08  | 0.61   | 0.58  | 2.15   | 1.69   | CASP6                             | 1.00 | 4.73   | 6.30   | 6.52   | 5.73   | 5.54   | 6.17   |
| SRA1                              | 1.00 | 0.11  | 0.22  | 0.23   | 0.15  | 0.10   | 0.12   | PSMB8                             | 1.00 | 19.18  | 18.93  | 18.69  | 18.75  | 1.80   | 18.22  |
| IL6                               | 1.00 | 0.96  | 0.98  | 0.04   | 1.08  | 0.06   | 0.04   | PIK3R1                            | 1.00 | 1.77   | 1.08   | 0.61   | 0.58   | 2.15   | 1.69   |
| MED1                              | 1.00 | 1.15  | 1.12  | 0.04   | 1.17  | 0.05   | 1.18   | PSMD3                             | 1.00 | 0.03   | 0.05   | 0.08   | 0.06   | 0.51   | 0.10   |
| PIK3CB                            | 1.00 | 1.03  | 0.03  | 0.88   | 1.07  | 1.05   | 1.08   | PSMC5                             | 1.00 | 0.05   | 1.00   | 0.01   | 1.03   | 0.07   | 0.03   |
| ITGA9                             | 1.00 | 0.55  | 0.07  | 0.89   | 0.90  | 0.98   | 0.71   | CDK4                              | 1.00 | 0.06   | 0.86   | 0.94   | 0.83   | 1.06   | 1.09   |
| PRKACA                            | 1.00 | 7.58  | 0.41  | 7.59   | 3.04  | 2.92   | 2.33   | BRCA1                             | 1.00 | 0.62   | 0.13   | 0.63   | 1.87   | 0.76   | 1.30   |
| GMFG                              | 1.00 | 0.11  | 3.46  | 3.33   | 3.46  | 1.64   | 3.56   | PIK3CB                            | 1.00 | 1.03   | 0.03   | 0.88   | 1.07   | 1.05   | 1.08   |
| IL1RN                             | 1.00 | 12.05 | 0.60  | 11.73  | 1.21  | 0.33   | 6.19   | IL6                               | 1.00 | 0.96   | 0.98   | 0.04   | 1.08   | 0.06   | 0.04   |
| AKT1                              | 1.00 | 1.02  | 3.95  | 0.30   | 3.92  | 1.03   | 2.13   | PIDD                              | 1.00 | 1.03   | 0.94   | 0.79   | 0.40   | 0.92   | 0.05   |
| NCOR1                             | 1.00 | 0.94  | 0.14  | 1.84   | 1.84  | 1.94   | 2.12   |                                   |      |        |        |        |        |        |        |

\* The red bottom represent up-regulated (>2 fold) proteins, green bottom represent down-regulated (<0.5 fold) proteins
